# Supplementary material for: Daily Satellite Observations of Nitrogen Dioxide Air Pollution Inequality in New York City, New York and Newark, New Jersey: Evaluation and Application
Source: PubMed Central journal article supplement — Environ Sci Technol. 2022 Oct 12;56(22):15298–311. doi: 10.1021/acs.est.2c02828 (PMC9670852; doi:10.1021/acs.est.2c02828), 2022-10-12
Supplement: es2c02828_si_001.pdf [file es2c02828_si_001.pdf]

## Supporting Information

### Daily Satellite Observations of Nitrogen Dioxide Air Pollution Inequality in New York City, New York and Newark, New Jersey: Evaluation and Application

Isabella M. Dressel<sup>1</sup>, Mary Angelique G. Demetillo<sup>1</sup>, Laura M. Judd<sup>2</sup>, Scott J. Janz<sup>3</sup>, Kimberly P. Fields<sup>4</sup>, Kang Sun<sup>5,6</sup>, Arlene M. Fiore<sup>7</sup>, Brian C. McDonald<sup>8</sup>, and Sally E. Pusede<sup>1\*</sup>

\*Corresponding author: sepusede@virginia.edu

<sup>1</sup>Department of Environmental Sciences, University of Virginia, Charlottesville, VA 22904, USA

<sup>2</sup>NASA Langley Research Center, Hampton, VA 23681, USA

<sup>3</sup>NASA Goddard Space Flight Center, Greenbelt, MD 20771, USA

<sup>4</sup>Carter G. Woodson Institute for African American and African Studies, University of Virginia, Charlottesville, VA 22904, USA

<sup>5</sup>Department of Civil, Structural and Environmental Engineering, University at Buffalo, Buffalo, NY 14260, USA

<sup>6</sup>Research and Education in eNergy, Environment and Water (RENEW) Institute, University at Buffalo, Buffalo, NY 14260, USA

<sup>7</sup>Department of Earth, Atmospheric and Planetary Sciences, Massachusetts Institute of Technology, Cambridge, MA 02139, USA

<sup>8</sup>Chemical Sciences Laboratory, NOAA Earth System Research Laboratories, Boulder, CO 80305, USA

**SI includes:** Figures S1–S5, Equation S1, and Tables S1–S8

**Table S1.** GCAS and GeoTASO flight rasters on 13 LISTOS flight days. Small raster flight patterns occurred in the early morning (8:15–9:50 am LT, local time), late morning (9:50–11:30 am LT), early afternoon (1:15–3:00 pm LT), and late afternoon (3:00–4:45 pm LT). Large raster flight patterns were flown on days when elevated air pollution was predicted over the Long Island Sound region in the morning (9–11 am LT) and afternoon (1:30–4:10 pm LT).

| <b>Flight date</b> | <b>Morning Raster</b> | <b>Afternoon Raster</b> |
|--------------------|-----------------------|-------------------------|
| 25 Jun 2018        | Large                 | Large                   |
| 30 Jun 2018        | Large                 | Large                   |
| 2 Jul 2018         | Large                 | Large                   |
| 19 Jul 2018        | Small                 | Small                   |
| 20 Jul 2018        | Small                 | Small                   |
| 5 Aug 2018         | Small                 | Small                   |
| 6 Aug 2018         | Small                 | Large                   |
| 15 Aug 2018        | Small                 | Small                   |
| 16 Aug 2018        | Large                 | Large                   |
| 24 Aug 2018        | Small                 | Small                   |
| 28 Aug 2018        | Large                 | Large                   |
| 29 Aug 2018        | Large                 | Large                   |
| 6 Sep 2018         | Large                 | Large                   |

**Figure S1.** GCAS and GeoTASO NO<sub>2</sub> TVCDs (molecules cm<sup>-2</sup>) during large (a) and small (b) raster flight patterns. Examples are 2 July 2018 and 20 July 2018, respectively. The black outline represents the New York City–Newark UA. Background map data: Landsat 8 composite January 2017–June 2020.

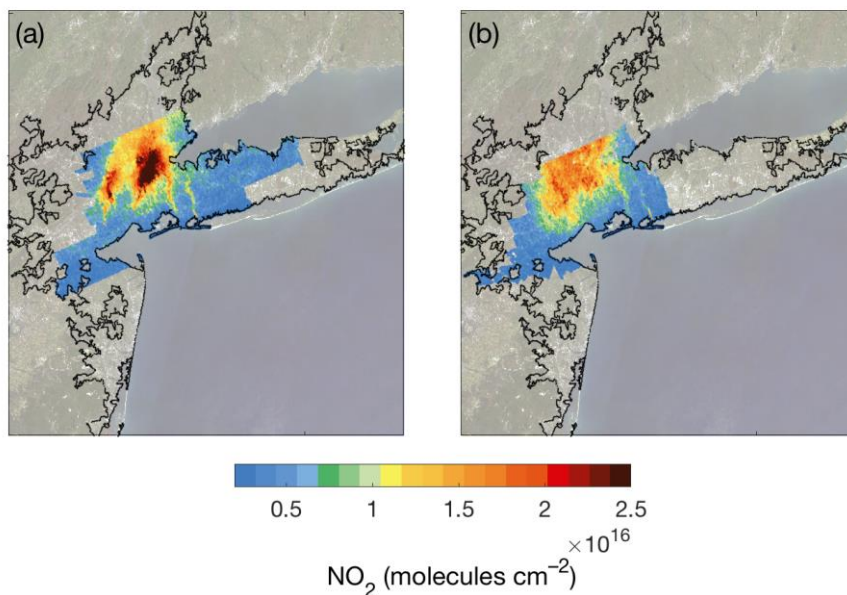

**Table S2.** Demographic group makeup (%) of populations sampled during each GCAS and GeoTASO flight raster, average flight raster demographic group makeup of sampled populations during LISTOS, and UA demographic composition.

| Flight Circuit | Race-Ethnicity Population (%) |                            |       |                     | Race-Ethnicity and Poverty Status (%) |     | Poverty status (%) |               |
|----------------|-------------------------------|----------------------------|-------|---------------------|---------------------------------------|-----|--------------------|---------------|
|                | White                         | Black and African American | Asian | Hispanic and Latino | LIN                                   | HIW | Below poverty      | Above poverty |
| 25 Jun 2018    |                               |                            |       |                     |                                       |     |                    |               |
| AM             | 41%                           | 17%                        | 12%   | 26%                 | 18%                                   | 15% | 7%                 | 72%           |
| PM             | 41%                           | 17%                        | 12%   | 27%                 | 18%                                   | 15% | 7%                 | 71%           |
| 30 Jun 2018    |                               |                            |       |                     |                                       |     |                    |               |
| AM             | 41%                           | 18%                        | 12%   | 27%                 | 18%                                   | 15% | 7%                 | 71%           |
| PM             | 41%                           | 17%                        | 12%   | 27%                 | 18%                                   | 15% | 7%                 | 71%           |
| 2 Jul 2018     |                               |                            |       |                     |                                       |     |                    |               |
| AM             | 39%                           | 18%                        | 12%   | 27%                 | 20%                                   | 14% | 8%                 | 70%           |
| PM             | 39%                           | 19%                        | 12%   | 28%                 | 20%                                   | 14% | 8%                 | 69%           |
| 19 Jul 2018    |                               |                            |       |                     |                                       |     |                    |               |
| AM 1           | 36%                           | 20%                        | 13%   | 28%                 | 21%                                   | 12% | 8%                 | 68%           |
| AM 2           | 36%                           | 20%                        | 13%   | 28%                 | 22%                                   | 11% | 8%                 | 67%           |
| PM 1           | 36%                           | 20%                        | 13%   | 28%                 | 21%                                   | 11% | 8%                 | 67%           |
| PM 2           | 36%                           | 20%                        | 13%   | 28%                 | 21%                                   | 11% | 8%                 | 67%           |
| 20 Jul 2018    |                               |                            |       |                     |                                       |     |                    |               |
| AM 1           | 36%                           | 20%                        | 13%   | 28%                 | 22%                                   | 11% | 9%                 | 67%           |
| AM 2           | 36%                           | 20%                        | 13%   | 28%                 | 21%                                   | 11% | 8%                 | 68%           |
| PM 1           | 36%                           | 20%                        | 13%   | 27%                 | 20%                                   | 11% | 8%                 | 68%           |
| PM 2           | 36%                           | 20%                        | 13%   | 28%                 | 22%                                   | 11% | 8%                 | 67%           |
| 5 Aug 2018     |                               |                            |       |                     |                                       |     |                    |               |
| AM 1           | 36%                           | 20%                        | 13%   | 29%                 | 22%                                   | 11% | 9%                 | 67%           |
| AM 2           | 36%                           | 20%                        | 13%   | 28%                 | 22%                                   | 11% | 8%                 | 67%           |
| PM 1           | 36%                           | 20%                        | 13%   | 28%                 | 22%                                   | 11% | 9%                 | 67%           |
| PM 2           | 37%                           | 20%                        | 12%   | 28%                 | 21%                                   | 12% | 8%                 | 67%           |
| 6 Aug 2018     |                               |                            |       |                     |                                       |     |                    |               |
| AM 1           | 37%                           | 19%                        | 13%   | 27%                 | 20%                                   | 12% | 8%                 | 68%           |
| AM 2           | 36%                           | 20%                        | 13%   | 28%                 | 21%                                   | 11% | 8%                 | 67%           |
| PM             | 40%                           | 20%                        | 12%   | 26%                 | 19%                                   | 14% | 8%                 | 70%           |

|                              |            |            |            |            |            |            |           |            |  |
|------------------------------|------------|------------|------------|------------|------------|------------|-----------|------------|--|
| 15 Aug 2018                  |            |            |            |            |            |            |           |            |  |
| AM 1                         | 37%        | 20%        | 13%        | 28%        | 21%        | 12%        | 8%        | 68%        |  |
| AM 2                         | 37%        | 19%        | 13%        | 28%        | 21%        | 12%        | 8%        | 68%        |  |
| PM 1                         | 37%        | 19%        | 13%        | 28%        | 21%        | 12%        | 8%        | 68%        |  |
| PM 2                         | 37%        | 20%        | 13%        | 28%        | 21%        | 12%        | 8%        | 68%        |  |
| 16 Aug 2018                  |            |            |            |            |            |            |           |            |  |
| AM                           | 44%        | 17%        | 12%        | 24%        | 14%        | 17%        | 6%        | 76%        |  |
| PM                           | 39%        | 18%        | 12%        | 27%        | 19%        | 14%        | 8%        | 70%        |  |
| 24 Aug 2018                  |            |            |            |            |            |            |           |            |  |
| AM 1                         | 35%        | 20%        | 13%        | 29%        | 22%        | 11%        | 9%        | 67%        |  |
| AM 2                         | 36%        | 20%        | 13%        | 28%        | 21%        | 11%        | 8%        | 67%        |  |
| PM 1                         | 36%        | 20%        | 13%        | 28%        | 21%        | 11%        | 8%        | 67%        |  |
| PM 2                         | 36%        | 20%        | 13%        | 28%        | 21%        | 11%        | 8%        | 67%        |  |
| 28 Aug 2018                  |            |            |            |            |            |            |           |            |  |
| AM                           | 40%        | 18%        | 12%        | 27%        | 19%        | 14%        | 7%        | 70%        |  |
| PM                           | 40%        | 18%        | 12%        | 27%        | 19%        | 14%        | 8%        | 70%        |  |
| 29 Aug 2018                  |            |            |            |            |            |            |           |            |  |
| AM                           | 40%        | 18%        | 12%        | 27%        | 19%        | 14%        | 7%        | 70%        |  |
| PM                           | 40%        | 18%        | 12%        | 27%        | 19%        | 14%        | 7%        | 70%        |  |
| 6 Sep 2018                   |            |            |            |            |            |            |           |            |  |
| AM                           | 40%        | 18%        | 12%        | 27%        | 19%        | 14%        | 8%        | 70%        |  |
| PM                           | 40%        | 18%        | 12%        | 27%        | 19%        | 14%        | 7%        | 71%        |  |
| <b>Mean of All Flights</b>   | <b>38%</b> | <b>19%</b> | <b>13%</b> | <b>28%</b> | <b>20%</b> | <b>13%</b> | <b>8%</b> | <b>69%</b> |  |
| <b>Mean of All UA Tracts</b> | <b>44%</b> | <b>16%</b> | <b>11%</b> | <b>25%</b> | <b>17%</b> | <b>16%</b> | <b>7%</b> | <b>73%</b> |  |

**Equation S1.** Population-weighted NO<sub>2</sub> columns are calculated as the product of the census tract-averaged NO<sub>2</sub> TVCD (NO<sub>2,j</sub>) and demographic group population (p<sub>j</sub>) in the *i*<sup>th</sup> tract summed over all tracts with NO<sub>2</sub> data (*n*). The summation is divided by the demographic group population (p<sub>j</sub>).

(SE1)            Population-weighted NO<sub>2,j</sub> =  $\sum_{i=1}^n \text{NO}_{2,i} p_{i,j} / \sum_{i=1}^n p_{i,j}$

**Figure S2.** Census tract population densities in the New York City–Newark UA (black line).  
Background map data: Landsat 8 composite January 2017–June 2020.

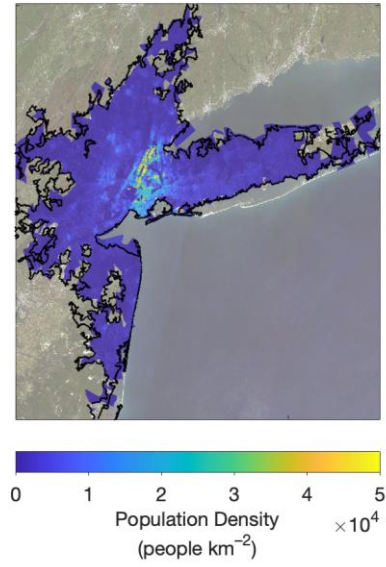



**Figure S3.** Locations of 11 NO<sub>2</sub>\* monitors (a), 17 O<sub>3</sub> monitors (b), and the 14 Automated Surface Observing System and Automated Weather Observing System stations (c). The black outline represents the New York City–Newark UA. Background map data: Landsat 8 composite January 2017–June 2020.

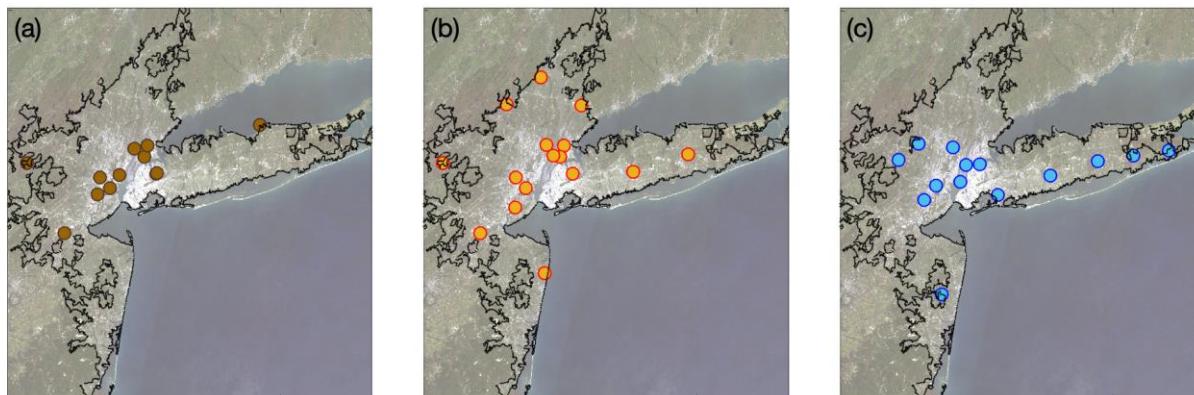

**Table S3.** GCAS and GeoTASO flight circuit population-weighted NO<sub>2</sub> (x10<sup>15</sup> molecules cm<sup>-2</sup>) and relative inequalities during LISTOS for Black and African Americans, Hispanics and Latinos, and Asians compared to non-Hispanic/Latino whites, for below poverty versus above poverty tracts, and for LIN compared to HIW tracts.

| Date               | Population-weighted NO <sub>2</sub> |                            |                 |            | Difference (%)             |                 |        | Population-weighted NO <sub>2</sub> |               | Difference (%) | Population-weighted NO <sub>2</sub> |            | Difference (%) |
|--------------------|-------------------------------------|----------------------------|-----------------|------------|----------------------------|-----------------|--------|-------------------------------------|---------------|----------------|-------------------------------------|------------|----------------|
|                    | White                               | Black and African American | Hispanic/Latino | Asian      | Black and African American | Hispanic/Latino | Asian  | Below poverty                       | Above poverty |                | LIN                                 | HIW        |                |
| <b>25 Jun 2018</b> |                                     |                            |                 |            |                            |                 |        |                                     |               |                |                                     |            |                |
| AM                 | 3.7 ± 0.0                           | 4.3 ± 0.1                  | 3.3 ± 0.0       | 3.8 ± 0.0  | 15 ± 2                     | -9 ± 2          | 4 ± 2  | 4.0 ± 0.1                           | 3.6 ± 0.0     | 8 ± 2          | 3.7 ± 0.1                           | 3.3 ± 0.1  | 11 ± 3         |
| PM                 | 4.8 ± 0.1                           | 5.8 ± 0.1                  | 5.0 ± 0.1       | 5.6 ± 0.1  | 18 ± 2                     | 4 ± 2           | 15 ± 2 | 6.3 ± 0.1                           | 4.8 ± 0.1     | 28 ± 2         | 5.7 ± 0.1                           | 4.0 ± 0.1  | 34 ± 3         |
| <b>30 Jun 2018</b> |                                     |                            |                 |            |                            |                 |        |                                     |               |                |                                     |            |                |
| AM                 | 8.2 ± 0.2                           | 10.5 ± 0.1                 | 10.4 ± 0.2      | 10.0 ± 0.2 | 24 ± 2                     | 23 ± 2          | 19 ± 3 | 12.6 ± 0.2                          | 8.4 ± 0.1     | 40 ± 2         | 12.0 ± 0.2                          | 6.7 ± 0.2  | 57 ± 3         |
| PM                 | 8.2 ± 0.2                           | 11.0 ± 0.2                 | 14.2 ± 0.2      | 11.3 ± 0.2 | 29 ± 3                     | 54 ± 2          | 32 ± 3 | 14.4 ± 0.2                          | 9.3 ± 0.1     | 43 ± 2         | 14.8 ± 0.3                          | 8.0 ± 0.2  | 59 ± 3         |
| <b>2 Jul 2018</b>  |                                     |                            |                 |            |                            |                 |        |                                     |               |                |                                     |            |                |
| AM                 | 20.4 ± 0.5                          | 21.1 ± 0.6                 | 32.1 ± 0.6      | 22.4 ± 0.6 | 3 ± 4                      | 45 ± 3          | 9 ± 3  | 32.9 ± 0.8                          | 20.7 ± 0.4    | 46 ± 3         | 32.6 ± 0.8                          | 22.6 ± 0.8 | 36 ± 4         |
| PM                 | 9.4 ± 0.2                           | 11.5 ± 0.3                 | 15.8 ± 0.2      | 10.2 ± 0.2 | 20 ± 3                     | 51 ± 2          | 8 ± 3  | 16.1 ± 0.3                          | 9.9 ± 0.1     | 48 ± 3         | 16.6 ± 0.3                          | 10.2 ± 0.3 | 48 ± 3         |
| <b>19 Jul 2018</b> |                                     |                            |                 |            |                            |                 |        |                                     |               |                |                                     |            |                |
| AM 1               | 10.3 ± 0.2                          | 10.2 ± 0.2                 | 10.0 ± 0.2      | 9.5 ± 0.2  | -1 ± 2                     | -2 ± 2          | -8 ± 2 | 10.4 ± 0.2                          | 10.0 ± 0.1    | 3 ± 2          | 10.1 ± 0.2                          | 9.3 ± 0.2  | 9 ± 3          |
| AM 2               | 12.3 ± 0.2                          | 11.8 ± 0.2                 | 11.2 ± 0.2      | 12.2 ± 0.2 | -4 ± 2                     | -9 ± 2          | -1 ± 2 | 11.5 ± 0.2                          | 12.2 ± 0.2    | -5 ± 2         | 11.4 ± 0.2                          | 10.7 ± 0.3 | 7 ± 3          |
| PM 1               | 18.1 ± 0.3                          | 19.5 ± 0.3                 | 18.6 ± 0.3      | 16.8 ± 0.3 | 7 ± 2                      | 3 ± 2           | -7 ± 2 | 20.5 ± 0.3                          | 17.5 ± 0.2    | 16 ± 2         | 20.2 ± 0.3                          | 19.7 ± 0.6 | 3 ± 4          |
| PM 2               | 19.9 ± 0.3                          | 20.6 ± 0.3                 | 23.8 ± 0.3      | 19.4 ± 0.3 | 3 ± 2                      | 18 ± 2          | -2 ± 2 | 25.3 ± 0.4                          | 19.1 ± 0.2    | 28 ± 2         | 25.7 ± 0.4                          | 21.8 ± 0.7 | 17 ± 3         |
| <b>20 Jul 2018</b> |                                     |                            |                 |            |                            |                 |        |                                     |               |                |                                     |            |                |
| AM 1               | 22.6 ± 0.3                          | 26.4 ± 0.4                 | 27.4 ± 0.3      | 23.9 ± 0.3 | 15 ± 2                     | 19 ± 2          | 5 ± 2  | 30.9 ± 0.4                          | 22.4 ± 0.2    | 32 ± 2         | 29.0 ± 0.4                          | 20.6 ± 0.6 | 34 ± 3         |
| AM 2               | 26.4 ± 0.4                          | 25.6 ± 0.4                 | 32.1 ± 0.4      | 31.1 ± 0.5 | -3 ± 2                     | 19 ± 2          | 16 ± 2 | 31.4 ± 0.5                          | 27.2 ± 0.3    | 14 ± 2         | 31.3 ± 0.5                          | 27.4 ± 0.8 | 13 ± 3         |
| PM 1               | 8.4 ± 0.1                           | 8.3 ± 0.1                  | 10.5 ± 0.1      | 7.7 ± 0.1  | -1 ± 2                     | 23 ± 2          | -8 ± 2 | 9.8 ± 0.2                           | 8.4 ± 0.1     | 16 ± 2         | 10.5 ± 0.2                          | 9.0 ± 0.2  | 16 ± 3         |
| PM 2               | 7.5 ± 0.1                           | 7.8 ± 0.1                  | 10.2 ± 0.1      | 8.0 ± 0.1  | 4 ± 2                      | 31 ± 2          | 7 ± 2  | 9.2 ± 0.1                           | 8.0 ± 0.1     | 14 ± 2         | 9.7 ± 0.1                           | 8.0 ± 0.2  | 19 ± 2         |
| <b>5 Aug 2018</b>  |                                     |                            |                 |            |                            |                 |        |                                     |               |                |                                     |            |                |
| AM 1               | 8.4 ± 0.2                           | 11.3 ± 0.2                 | 9.0 ± 0.2       | 10.0 ± 0.2 | 30 ± 3                     | 7 ± 3           | 18 ± 3 | 10.5 ± 0.2                          | 8.8 ± 0.1     | 18 ± 3         | 10.0 ± 0.2                          | 6.1 ± 0.3  | 48 ± 5         |
| AM 2               | 8.1 ± 0.2                           | 9.7 ± 0.2                  | 7.7 ± 0.2       | 10.5 ± 0.2 | 17 ± 3                     | -6 ± 4          | 25 ± 3 | 8.5 ± 0.2                           | 8.6 ± 0.2     | -1 ± 3         | 8.2 ± 0.2                           | 6.0 ± 0.3  | 31 ± 5         |
| PM 1               | 6.7 ± 0.1                           | 7.1 ± 0.1                  | 7.2 ± 0.1       | 8.7 ± 0.1  | 6 ± 2                      | 7 ± 2           | 26 ± 2 | 7.2 ± 0.1                           | 7. ± 0.1      | 1 ± 2          | 7.1 ± 0.1                           | 6.9 ± 0.2  | 3 ± 3          |
| PM 2               | 7.1 ± 0.1                           | 7.4 ± 0.1                  | 7.5 ± 0.1       | 9.1 ± 0.1  | 4 ± 2                      | 6 ± 2           | 25 ± 2 | 7.6 ± 0.1                           | 7.5 ± 0.1     | 2 ± 2          | 7.4 ± 0.1                           | 7.0 ± 0.1  | 5 ± 2          |
| <b>6 Aug 2018</b>  |                                     |                            |                 |            |                            |                 |        |                                     |               |                |                                     |            |                |
| AM 1               | 10.7 ± 0.2                          | 14.2 ± 0.2                 | 11.1 ± 0.2      | 13.3 ± 0.2 | 28 ± 2                     | 3 ± 2           | 21 ± 2 | 12.5 ± 0.2                          | 11.7 ± 0.1    | 7 ± 2          | 11.6 ± 0.2                          | 9.0 ± 0.3  | 25 ± 4         |
| AM 2               | 14.5 ± 0.2                          | 17.9 ± 0.3                 | 17.8 ± 0.3      | 20.2 ± 0.3 | 21 ± 2                     | 20 ± 2          | 33 ± 2 | 17.7 ± 0.3                          | 16.5 ± 0.2    | 7 ± 2          | 17.1 ± 0.3                          | 13.4 ± 0.4 | 24 ± 4         |
| PM                 | 10.3 ± 0.1                          | 12.6 ± 0.2                 | 12.5 ± 0.2      | 12.7 ± 0.2 | 20 ± 2                     | 20 ± 2          | 21 ± 2 | 13.2 ± 0.2                          | 11.0 ± 0.1    | 19 ± 2         | 13.0 ± 0.2                          | 10.2 ± 0.2 | 24 ± 3         |

|                    |            |            |            |            |        |        |        |            |            |        |            |            |        |
|--------------------|------------|------------|------------|------------|--------|--------|--------|------------|------------|--------|------------|------------|--------|
| <b>15 Aug 2018</b> |            |            |            |            |        |        |        |            |            |        |            |            |        |
| <b>AM 1</b>        | 8.1 ± 0.1  | 9.8 ± 0.1  | 8.4 ± 0.1  | 10.0 ± 0.1 | 18 ± 2 | 21 ± 2 | 4 ± 2  | 9.5 ± 0.1  | 8.6 ± 0.1  | 10 ± 2 | 8.9 ± 0.1  | 6.9 ± 0.2  | 26 ± 3 |
| <b>AM 2</b>        | 8.1 ± 0.1  | 9.5 ± 0.1  | 8.2 ± 0.2  | 9.8 ± 0.1  | 16 ± 2 | 19 ± 2 | 1 ± 2  | 9.1 ± 0.2  | 8.5 ± 0.1  | 7 ± 2  | 8.4 ± 0.2  | 7.0 ± 0.2  | 19 ± 3 |
| <b>PM 1</b>        | 6.1 ± 0.1  | 7.1 ± 0.1  | 6.0 ± 0.1  | 7.4 ± 0.1  | 15 ± 2 | 19 ± 2 | -2 ± 2 | 6.8 ± 0.1  | 6.3 ± 0.1  | 8 ± 2  | 6.3 ± 0.1  | 5.1 ± 0.1  | 22 ± 3 |
| <b>PM 2</b>        | 7.2 ± 0.1  | 8.7 ± 0.1  | 6.7 ± 0.1  | 8.4 ± 0.1  | 18 ± 2 | 16 ± 2 | -7 ± 2 | 8.0 ± 0.1  | 7.4 ± 0.1  | 8 ± 2  | 7.3 ± 0.1  | 6.3 ± 0.1  | 16 ± 3 |
| <b>16 Aug 2018</b> |            |            |            |            |        |        |        |            |            |        |            |            |        |
| <b>AM</b>          | 7.8 ± 0.1  | 10.3 ± 0.2 | 7.7 ± 0.1  | 8.7 ± 0.1  | 28 ± 2 | 12 ± 2 | -1 ± 2 | 10.1 ± 0.2 | 7.9 ± 0.1  | 24 ± 3 | 9.4 ± 0.2  | 7.2 ± 0.2  | 26 ± 3 |
| <b>PM</b>          | 8.5 ± 0.1  | 11.7 ± 0.2 | 9.1 ± 0.1  | 10.6 ± 0.1 | 31 ± 2 | 22 ± 2 | 7 ± 2  | 10.1 ± 0.2 | 9.3 ± 0.1  | 8 ± 2  | 9.6 ± 0.2  | 8.0 ± 0.2  | 18 ± 3 |
| <b>24 Aug 2018</b> |            |            |            |            |        |        |        |            |            |        |            |            |        |
| <b>AM 1</b>        | 10.7 ± 0.2 | 12.2 ± 0.2 | 10.8 ± 0.2 | 11.6 ± 0.2 | 12 ± 2 | 8 ± 2  | 1 ± 2  | 12.5 ± 0.2 | 10.6 ± 0.1 | 17 ± 2 | 11.3 ± 0.2 | 8.8 ± 0.3  | 25 ± 3 |
| <b>AM 2</b>        | 21.2 ± 0.4 | 28.5 ± 0.5 | 23.5 ± 0.4 | 23.6 ± 0.4 | 30 ± 2 | 11 ± 2 | 10 ± 3 | 27.2 ± 0.5 | 22.2 ± 0.3 | 20 ± 2 | 25.1 ± 0.5 | 19.4 ± 0.6 | 25 ± 4 |
| <b>PM 1</b>        | 16.6 ± 0.3 | 22.5 ± 0.4 | 28.2 ± 0.4 | 20.4 ± 0.4 | 30 ± 3 | 20 ± 3 | 51 ± 3 | 26.4 ± 0.6 | 19.3 ± 0.3 | 31 ± 3 | 27.3 ± 0.6 | 18.4 ± 0.6 | 39 ± 4 |
| <b>PM 2</b>        | 13.1 ± 0.2 | 14.2 ± 0.2 | 17.5 ± 0.2 | 15.2 ± 0.2 | 8 ± 2  | 14 ± 2 | 28 ± 2 | 17.1 ± 0.3 | 13.7 ± 0.2 | 22 ± 2 | 17.2 ± 0.3 | 14.0 ± 0.4 | 20 ± 3 |
| <b>28 Aug 2018</b> |            |            |            |            |        |        |        |            |            |        |            |            |        |
| <b>AM</b>          | 12.4 ± 0.2 | 14.3 ± 0.2 | 16.0 ± 0.2 | 17.1 ± 0.2 | 14 ± 2 | 32 ± 2 | 25 ± 2 | 16.2 ± 0.2 | 13.6 ± 0.1 | 18 ± 2 | 15.7 ± 0.2 | 11.7 ± 0.2 | 29 ± 2 |
| <b>PM</b>          | 8.6 ± 0.1  | 8.9 ± 0.1  | 9.4 ± 0.2  | 10.3 ± 0.2 | 3 ± 2  | 18 ± 2 | 8 ± 2  | 10.1 ± 0.2 | 8.0 ± 0.1  | 15 ± 2 | 9.9 ± 0.2  | 8.8 ± 0.2  | 12 ± 3 |
| <b>29 Aug 2018</b> |            |            |            |            |        |        |        |            |            |        |            |            |        |
| <b>AM</b>          | 13.4 ± 0.2 | 15.1 ± 0.2 | 17.5 ± 0.2 | 19.0 ± 0.3 | 12 ± 2 | 35 ± 2 | 27 ± 2 | 17.5 ± 0.3 | 14.6 ± 0.2 | 18 ± 2 | 17.6 ± 0.3 | 12.8 ± 0.2 | 32 ± 2 |
| <b>PM</b>          | 7.5 ± 0.1  | 8.2 ± 0.1  | 8.1 ± 0.1  | 9.0 ± 0.1  | 9 ± 2  | 18 ± 2 | 7 ± 2  | 8.4 ± 0.1  | 7.8 ± 0.1  | 7 ± 2  | 8.1 ± 0.1  | 7.5 ± 0.2  | 8 ± 3  |
| <b>6 Sep 2018</b>  |            |            |            |            |        |        |        |            |            |        |            |            |        |
| <b>AM</b>          | 11.4 ± 0.2 | 12.1 ± 0.2 | 14.6 ± 0.2 | 14.6 ± 0.2 | 6 ± 2  | 24 ± 2 | 24 ± 2 | 15.0 ± 0.2 | 11.8 ± 0.1 | 24 ± 2 | 14.7 ± 0.2 | 11.0 ± 0.2 | 29 ± 3 |
| <b>PM</b>          | 7.9 ± 0.1  | 8.5 ± 0.1  | 9.7 ± 0.2  | 9.7 ± 0.2  | 7 ± 2  | 21 ± 2 | 21 ± 2 | 10.4 ± 0.2 | 8.0 ± 0.1  | 26 ± 2 | 9.9 ± 0.2  | 8.2 ± 0.2  | 20 ± 3 |

**Table S4.** Correlation coefficients for absolute and relative inequalities observed by GCAS and GeoTASO during LISTOS and UA-mean NO<sub>2</sub>\* mixing ratios (during flight times), surface wind speeds (during flight times), surface temperatures (during flight times), daily maximum temperatures, and UA-mean MD8A O<sub>3</sub> mixing ratios. Pearson correlation coefficients (*r*) are given for correlations with NO<sub>2</sub> and Spearman rank correlation coefficients (*ρ*) are given for all others. All correlation coefficients are significant to 1% (*p* < 0.010) unless indicated unless indicated (†), which means significant to 5%.

|                             | Correlations with Absolute Circuit Inequalities |                           |                       |                     |                     |                           | Correlations with Relative Circuit Inequalities |                       |                     |                     |                     |
|-----------------------------|-------------------------------------------------|---------------------------|-----------------------|---------------------|---------------------|---------------------------|-------------------------------------------------|-----------------------|---------------------|---------------------|---------------------|
|                             | Surface Wind Speeds                             | Surface NO <sub>2</sub> * | NO <sub>2</sub> TVCDs | MD8A O <sub>3</sub> | Surface Temperature | Daily Maximum Temperature | Surface Wind Speeds                             | NO <sub>2</sub> TVCDs | MD8A O <sub>3</sub> | Surface Temperature | Maximum Temperature |
| Black and African Americans | -0.495                                          | 0.366†                    | -                     | -                   | -                   | -                         | -                                               | -                     | -                   | -                   | -                   |
| Hispanics and Latinos       | -                                               | -                         | 0.574                 | 0.364†              | -                   | -                         | -                                               | 0.328†                | 0.365†              | -                   | -                   |
| Asians                      | -                                               | -                         | -                     | -                   | 0.363†              | 0.519                     | -                                               | -                     | -                   | 0.565               | 0.679               |
| Below Poverty Tracts        | -                                               | 0.459                     | 0.613                 | -                   | -                   | -                         | -                                               | -                     | -                   | -                   | -                   |
| LINs                        | -0.520                                          | 0.416†                    | 0.530                 | -                   | -                   | -                         | -0.362†                                         | -                     | -                   | -                   | 0.329†              |

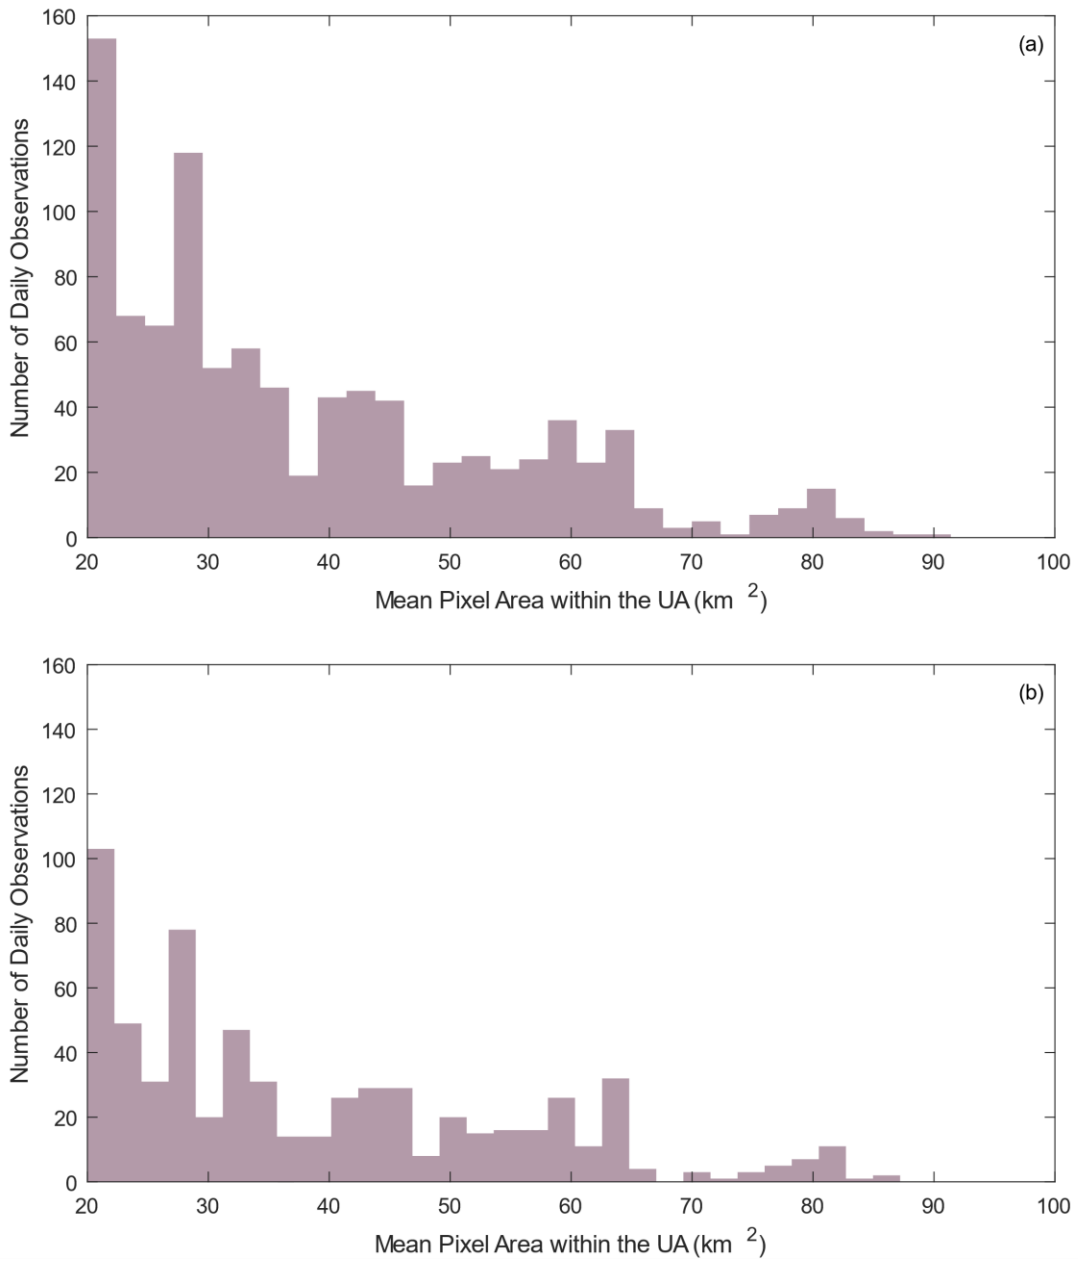

**Figure S4.** Daily TROPOMI overpass mean pixel areas within the UA (qa value > 0.75) over May 2018–September 2021 on all days (a) and days with over 30% UA coverage (b).

**Table S5.** Effect of TROPOMI pixel area on mean and individual daily relative inequalities (May 2018–September 2021) on all observation days for Black and African Americans, Hispanics and Latinos, and Asians compared to non-Hispanic/Latino whites, for below poverty versus above poverty tracts, and for LIN compared to HIW tracts. Daily inequalities are assessed using the coefficient of variation. Errors are 95% confidence intervals based on bootstrapped distributions sampled with replacement  $10^4$  times.

| Pixel Area<br>(km <sup>2</sup> ) | Mean of Daily Inequalities        |                             |        |                            |        | Daily Inequalities                |                             |        |                            |      |
|----------------------------------|-----------------------------------|-----------------------------|--------|----------------------------|--------|-----------------------------------|-----------------------------|--------|----------------------------|------|
|                                  | Relative Inequalities (%)         |                             |        |                            |        | Coefficient of Variation          |                             |        |                            |      |
|                                  | Black and<br>African<br>Americans | Hispanics<br>and<br>Latinos | Asians | Below<br>Poverty<br>Tracts | LINs   | Black and<br>African<br>Americans | Hispanics<br>and<br>Latinos | Asians | Below<br>Poverty<br>Tracts | LINs |
| 20–25                            | 25 ± 3                            | 24 ± 3                      | 22 ± 2 | 24 ± 2                     | 34 ± 3 | 0.78                              | 0.83                        | 0.79   | 0.66                       | 0.67 |
| 25–30                            | 23 ± 3                            | 22 ± 3                      | 20 ± 3 | 22 ± 3                     | 32 ± 4 | 0.93                              | 0.97                        | 0.91   | 0.85                       | 0.80 |
| 30–35                            | 25 ± 3                            | 24 ± 3                      | 25 ± 3 | 21 ± 3                     | 32 ± 4 | 0.76                              | 0.76                        | 0.62   | 0.78                       | 0.70 |
| 35–45                            | 25 ± 3                            | 21 ± 3                      | 21 ± 3 | 18 ± 5                     | 32 ± 4 | 0.78                              | 0.92                        | 0.87   | 1.49                       | 0.72 |
| 45–60                            | 25 ± 3                            | 22 ± 3                      | 23 ± 3 | 21 ± 3                     | 33 ± 4 | 0.81                              | 0.87                        | 0.78   | 0.83                       | 0.79 |
| >60                              | 19 ± 3                            | 19 ± 3                      | 18 ± 3 | 19 ± 3                     | 26 ± 4 | 0.91                              | 0.97                        | 0.88   | 0.81                       | 0.86 |

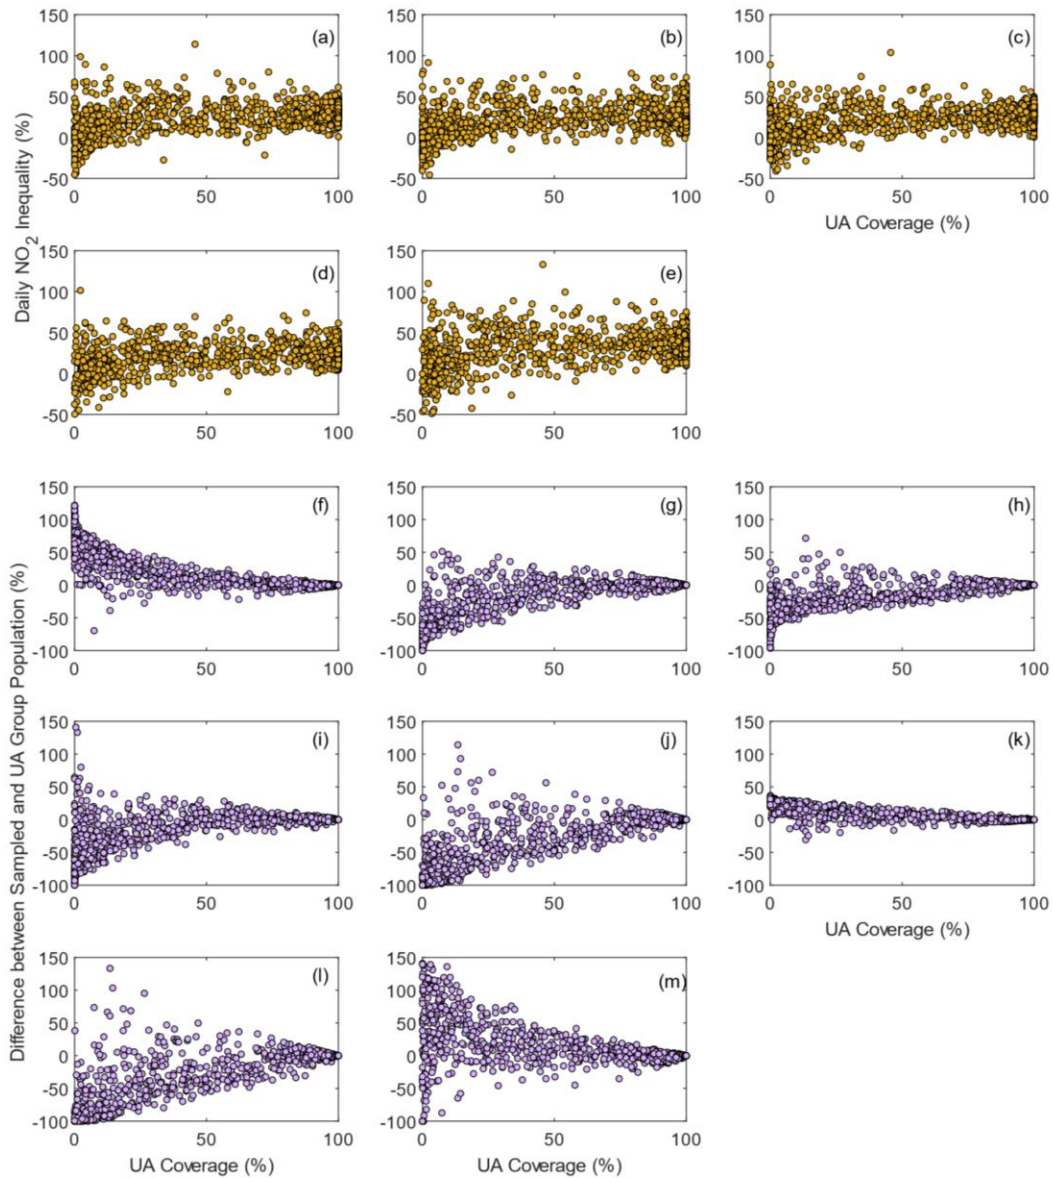

**Figure S5.** Daily TROPOMI relative NO<sub>2</sub> inequalities over May 2018–September 2021 as a function of overpass percent UA coverage (%) for Black and African Americans (a), Hispanics and Latinos (b), and Asians (c) compared to non-Hispanic/Latino whites, below-poverty versus above poverty tracts (d), and LIN compared to HIW tracts (e), and daily percent difference in sampled census tract demographics (%) from total UA demographics versus percent UA coverage (%) for non-Hispanic/Latino whites (f), Black and African Americans (g), Hispanics and Latinos (h), Asians (i), below-poverty tracts (j), above poverty tracts (k), LINs (l), and HIWs (m).

**Table S6.** Influence of UA-mean daily (12–3 pm LT) surface wind speeds, NO<sub>2</sub> mixing ratios, and TROPOMI pixel areas on mean daily Pearson correlation coefficients between TROPOMI NO<sub>2</sub> TVCDs and surface NO<sub>2</sub>\* concentrations at distances between TROPOMI pixel centers and surface NO<sub>2</sub>\* monitors. Bootstrapped 95% confidence intervals sampled with replacement 10<sup>5</sup> times are reported for column-surface correlation coefficients on days with low and high wind speeds, surface NO<sub>2</sub>\* concentrations, column NO<sub>2</sub> concentrations, and pixel areas, defined as the days in the lowest quartile bin and highest quartile bin, respectively. Only significant correlation coefficients are included in means ( $p < 0.050$ ).

|         | Wind speeds |             | Surface NO <sub>2</sub> * |             | Column NO <sub>2</sub> |             | Pixel area  |             |
|---------|-------------|-------------|---------------------------|-------------|------------------------|-------------|-------------|-------------|
|         | Low         | High        | Low                       | High        | Low                    | High        | Small       | Large       |
| <1 km   | 0.63 ± 0.08 | 0.57 ± 0.07 | 0.57 ± 0.06               | 0.65 ± 0.10 | 0.52 ± 0.11            | 0.64 ± 0.06 | 0.59 ± 0.06 | 0.63 ± 0.07 |
| <2 km   | 0.61 ± 0.07 | 0.50 ± 0.06 | 0.51 ± 0.05               | 0.63 ± 0.10 | 0.50 ± 0.08            | 0.59 ± 0.06 | 0.55 ± 0.06 | 0.53 ± 0.07 |
| 2–5 km  | 0.56 ± 0.06 | 0.43 ± 0.05 | 0.47 ± 0.04               | 0.57 ± 0.08 | 0.51 ± 0.04            | 0.53 ± 0.05 | 0.49 ± 0.04 | 0.49 ± 0.06 |
| 5–10 km | 0.50 ± 0.04 | 0.38 ± 0.04 | 0.40 ± 0.03               | 0.55 ± 0.04 | 0.42 ± 0.04            | 0.48 ± 0.04 | 0.43 ± 0.03 | 0.42 ± 0.04 |



**Table S7.** Correlation coefficients between daily absolute inequalities and UA-mean NO<sub>2</sub>\* mixing ratios (12–3 pm LT), NO<sub>2</sub> TVCDs, surface wind speeds (12–3 pm LT), surface temperatures (12–3 pm LT), daily maximum temperatures, and MD8A O<sub>3</sub> mixing ratios and between daily relative inequalities and UA-mean NO<sub>2</sub>\* mixing ratios and NO<sub>2</sub> TVCDs. Pearson correlation coefficients (*r*) are given for correlations between inequalities and surface NO<sub>2</sub>\* and NO<sub>2</sub> TVCDs. Spearman rank correlation coefficients (*ρ*) are given for all other correlations. Relationships are analyzed during ozone season (May–September) for days with TROPOMI observations with >60% UA coverage. All correlation coefficients are significant to 1% (*p* < 0.010) unless indicated unless indicated (†), which means significant to 5%.

| Ozone Season                |                     |                           |                        |               |             |                     |                           |                        |
|-----------------------------|---------------------|---------------------------|------------------------|---------------|-------------|---------------------|---------------------------|------------------------|
|                             | Absolute Inequality |                           |                        |               |             | Relative Inequality |                           |                        |
|                             | Wind Speed          | Surface NO <sub>2</sub> * | Column NO <sub>2</sub> | Surface Ozone | Temperature | Maximum Temperature | Surface NO <sub>2</sub> * | Column NO <sub>2</sub> |
| Black and African Americans | -0.40               | 0.58                      | 0.63                   | 0.36          | —           | —                   | 0.21                      | —                      |
| Asians                      | -0.32               | 0.62                      | 0.65                   | 0.50          | 0.22        | 0.27                | 0.41                      | 0.31                   |
| Hispanics and Latinos       | -0.43               | 0.57                      | 0.65                   | 0.46          | 0.19        | 0.19                | 0.19                      | —                      |
| Below-poverty tracts        | -0.38               | 0.64                      | 0.63                   | 0.46          | 0.18        | 0.23                | 0.34                      | 0.18                   |
| LIN                         | -0.41               | 0.65                      | 0.65                   | 0.45          | 0.15†       | 0.19                | 0.32                      | 0.13†                  |

**Table S8.** Ratio of weekday (Tuesday–Friday) to weekend (Saturday–Sunday) population-weighted MDA8 O<sub>3</sub> NAAQS exceedance frequencies over May 2018–September 2021 for non-Hispanic/Latino whites, Black and African Americans, Hispanics, Asians, above poverty tracts, below poverty tracts, HIWs, and LINs for census tract center distances of 1–10 km from an O<sub>3</sub> monitor. Weekdays are defined as Tuesdays–Fridays and weekends as Saturdays–Sundays, with weekday and weekend census tract-averaged exceedance counts divided by four and two, respectively. Uncertainties are provided as standard errors.

| <b>Radius from Monitor</b> | <b>Non-Hispanic/Latino whites</b> | <b>Black and African Americans</b> | <b>Hispanics/Latinos</b> | <b>Asians</b> | <b>Above Poverty</b> | <b>Below Poverty</b> | <b>HIWs</b> | <b>LINs</b> |
|----------------------------|-----------------------------------|------------------------------------|--------------------------|---------------|----------------------|----------------------|-------------|-------------|
| <b>1 km</b>                | 1.2 ± 0.1                         | 1.3 ± 0.1                          | 1.0 ± 0.1                | 1.3 ± 0.1     | 1.2 ± 0.1            | 1.1 ± 0.1            | 4.2 ± 2.8   | 1.1 ± 0.1   |
| <b>2 km</b>                | 1.3 ± 0.1                         | 1.2 ± 0.1                          | 1.1 ± 0.0                | 1.3 ± 0.1     | 1.3 ± 0.1            | 1.1 ± 0.0            | 1.2 ± 0.2   | 1.1 ± 0.0   |
| <b>5 km</b>                | 1.4 ± 0.0                         | 1.2 ± 0.0                          | 1.1 ± 0.0                | 1.3 ± 0.0     | 1.3 ± 0.0            | 1.1 ± 0.0            | 1.3 ± 0.1   | 1.1 ± 0.0   |
| <b>7 km</b>                | 1.3 ± 0.0                         | 1.2 ± 0.0                          | 1.2 ± 0.0                | 1.3 ± 0.0     | 1.3 ± 0.0            | 1.2 ± 0.0            | 1.3 ± 0.1   | 1.2 ± 0.0   |
| <b>10 km</b>               | 1.3 ± 0.0                         | 1.2 ± 0.0                          | 1.2 ± 0.0                | 1.3 ± 0.0     | 1.3 ± 0.0            | 1.2 ± 0.0            | 1.2 ± 0.0   | 1.2 ± 0.0   |
